# Supplementary material
Source: PubMed Central journal article supplement (PMC7661069)
Supplement: 20-00423.pdf [file 20-00423.pdf]

**On-line Table: Patient demographics, procedural, and clinical results**

| Case | Age (yr) | Sex | IV tPA | NIHSS on Admission | Groin to Re-canalization Time (min) | Pre-operative Stenosis % (NASCET) | Post-Dotter Stenosis % (NASCET) | Distal Intracranial Treatment | Acute Re-occlusion | Treatment for Acute Re-occlusion | TICI Score | Subacute Re-occlusion | Eventual Treatment                | ICH | sICH | NIHSS at Discharge |
|------|----------|-----|--------|--------------------|-------------------------------------|-----------------------------------|---------------------------------|-------------------------------|--------------------|----------------------------------|------------|-----------------------|-----------------------------------|-----|------|--------------------|
| 1    | 67       | M   | 0      | 22                 | 22                                  | 100                               | 80                              | Aspiration+SR                 | 0                  | NA                               | 3          | 1                     | None, left with occlusion         | 0   | 0    | 3                  |
| 2    | 81       | F   | 0      | 30                 | 14                                  | 100                               | 50                              | NA                            | 1                  | PTA with EPD                     | 3          | 0                     | None, left with residual stenosis | 0   | 0    | 3                  |
| 3    | 57       | M   | 1      | 30                 | 26                                  | 100                               | 61                              | Aspiration+SR                 | 0                  | NA                               | 3          | 0                     | None, left with residual stenosis | 1   | 0    | 1                  |
| 4    | 72       | F   | 1      | 17                 | 15                                  | 100                               | 3                               | ADAPT                         | 0                  | NA                               | 2a         | 1                     | None, left with occlusion         | 0   | 0    | 13                 |
| 5    | 49       | M   | 0      | 14                 | 42                                  | 100                               | 4                               | Aspiration+SR                 | 0                  | NA                               | 2b         | 0                     | None, left with residual stenosis | 0   | 0    | 1                  |
| 6    | 63       | M   | 0      | 6                  | 33                                  | 100                               | 50                              | Aspiration+SR                 | 0                  | NA                               | 3          | 0                     | CEA, 6 mo later                   | 0   | 0    | 0                  |
| 7    | 58       | M   | 0      | 11                 | 18                                  | 100                               | 60                              | Aspiration+SR                 | 0                  | NA                               | 3          | 0                     | None, left with residual stenosis | 0   | 0    | 1                  |
| 8    | 67       | M   | 1      | 8                  | 15                                  | 100                               | 65                              | ADAPT                         | 0                  | NA                               | 3          | 0                     | CEA, 7 days later                 | 0   | 0    | 0                  |
| 9    | 54       | M   | 1      | 16                 | 31                                  | 100                               | 50                              | Aspiration+SR                 | 0                  | NA                               | 2b         | 0                     | None, left with residual stenosis | 0   | 0    | 0                  |
| 10   | 58       | F   | 0      | 15                 | 9                                   | 100                               | 60                              | ADAPT                         | 0                  | NA                               | 2b         | 1                     | None, left with occlusion         | 0   | 0    | 2                  |
| 11   | 63       | M   | 1      | 21                 | 24                                  | 90                                | 34                              | ADAPT                         | 0                  | NA                               | 3          | 0                     | None, left with residual stenosis | 0   | 0    | 10                 |
| 12   | 57       | M   | 0      | 6                  | 38                                  | 95                                | 60                              | ADAPT                         | 0                  | NA                               | 2b         | 0                     | CEA, 1 mo later                   | 0   | 0    | 1                  |
| 13   | 64       | M   | 1      | 6                  | 16                                  | 100                               | 90                              | ADAPT                         | 1                  | Stent with EPD, PTA              | 2b         | 0                     | None, left with stent             | 0   | 0    | 2                  |
| 14   | 61       | M   | 0      | 14                 | 13                                  | 100                               | 60                              | Aspiration+SR                 | 0                  | NA                               | 2b         | 0                     | None, left with residual stenosis | 1   | 0    | 1                  |
| 15   | 92       | M   | 0      | 20                 | 25                                  | 95                                | 1                               | Aspiration+SR                 | 0                  | NA                               | 3          | 0                     | None, left with residual stenosis | 0   | 0    | 20                 |
| 16   | 60       | M   | 0      | 21                 | 12                                  | 100                               | 80                              | Aspiration+SR                 | 0                  | NA                               | 3          | 1                     | None, left with occlusion         | 0   | 0    | 4                  |
| 17   | 81       | M   | 1      | 26                 | 21                                  | 90                                | 30                              | Aspiration+SR                 | 0                  | NA                               | 3          | 0                     | CEA, 1 mo later                   | 0   | 0    | 3                  |

*Continued on next page*

**On-line Table: Continued**

| Case | Age (yr) | Sex | IV tPA | NIHSS on Admission | Groin to Re-canalization Time (min) | Pre-operative Stenosis % (NAS CET) | Post-Dotter Stenosis % (NAS CET) | Distal Intracranial Treatment | Acute Re-occlusion | Treatment for Acute Re-occlusion | TICI Score | Subacute Re-occlusion | Eventual Treatment                | ICH | sICH | NIHSS at Discharge |
|------|----------|-----|--------|--------------------|-------------------------------------|------------------------------------|----------------------------------|-------------------------------|--------------------|----------------------------------|------------|-----------------------|-----------------------------------|-----|------|--------------------|
| 18   | 57       | M   | 0      | 14                 | 20                                  | 100                                | 57                               | ADAPT                         | 0                  | NA                               | 3          | 0                     | None, left with residual stenosis | 0   | 0    | 0                  |
| 19   | 75       | F   | 0      | 18                 | 60                                  | 100                                | 70                               | Aspiration + SR               | 0                  | NA                               | 2b         | 0                     | None                              | 1   |      |                    |
| 20   | 57       | F   | 0      | 15                 | 22                                  | 100                                | 90                               | Aspiration + SR               | 1                  | Stent with EPD                   | 3          | 0                     | None, left with stent             | 0   | 0    | 1                  |
| 21   | 54       | M   | 0      | 18                 | 17                                  | 100                                | 40                               | Aspiration + SR               | 1                  | Stent with EPD, PTA              | 2b         | 0                     | None, left with stent             | 0   | 0    | 2                  |
| 22   | 65       | M   | 0      | 14                 | 20                                  | 95                                 | 50                               | Aspiration + SR               | 0                  | NA                               | 3          | 0                     | None, left with residual stenosis | 0   | 0    | 3                  |
| 23   | 59       | F   | 0      | 23                 | 41                                  | 95                                 | 50                               | Aspiration + SR               | 0                  | NA                               | 2b         | 1                     | None, left with occlusion         | 0   | 0    | 3                  |
| 24   | 46       | M   | 0      | 26                 | 23                                  | 100                                | 25                               | ADAPT                         | 0                  | NA                               | 3          | 0                     | None                              | 0   | 0    | 10                 |
| 25   | 72       | M   | 0      | 8                  | 16                                  | 100                                | 50                               | NA                            | 0                  | NA                               | 3          | 1                     | None, left with occlusion         | 0   | 0    | 6                  |
| 26   | 58       | M   | 0      | 22                 | 17                                  | 100                                | 80                               | Aspiration + SR               | 1                  | Stent with EPD, PTA              | 2b         | 1                     | None, left with occluded stent    | 0   | 0    | 20                 |
| 27   | 55       | M   | 0      | 24                 | 88                                  | 100                                | 100                              | Aspiration + SR               | 1                  | Stent with EPD, PTA              | 2b         | 1                     | None, left with occluded stent    | 1   | 0    | 16                 |
| 28   | 67       | F   | 0      | 15                 | 23                                  | 100                                | 70                               | ADAPT                         | 0                  | NA                               | 3          | 0                     | CEA, 7 days later                 | 0   | 0    | 3                  |
| 29   | 57       | M   | 1      | 12                 | 15                                  | 95                                 | 60                               | Aspiration + SR               | 0                  | NA                               | 3          | 0                     | CEA, 2 days later                 | 0   | 0    | 1                  |
| 30   | 64       | M   | 1      | 28                 | 18                                  | 95                                 | 80                               | ADAPT                         | 0                  | NA                               | 3          | 0                     | CEA, 1 day later                  | 0   | 0    | 5                  |
| 31   | 81       | M   | 1      | 21                 | 7                                   | 90                                 | 50                               | ADAPT                         | 0                  | NA                               | 2b         | 0                     | None, left with residual stenosis | 0   | 0    | 15                 |
| 32   | 66       | M   | 1      | 20                 | 42                                  | 100                                | 80                               | ADAPT                         | 0                  | NA                               | 2b         | 0                     | Carotid stent 2 months later      | 0   | 0    | 17                 |

**Note:**—CEA indicates carotid endarterectomy; EPD, embolic protection device; NA, not applicable; PTA, percutaneous transluminal angioplasty; SR, stent retriever.
